# Supplementary material for: Multidrug-Resistant Acinetobacter baumannii Genetic Characterization and Spread in Lithuania in 2014, 2016, and 2018
Source: MDPI journal article supplement (doi:10.3390/life11020151), 2021-02-16

Tree scale: 10

**Resistance genes**

|                  |
|------------------|
| TEM-092          |
| NDM              |
| OXA-51           |
| GES-11           |
| VIM-1            |
| OXA sub-1        |
| OXA sub-2        |
| OXA sub-3        |
| OXA sub-4        |
| RTG-4            |
| aacC1            |
| aacC2            |
| aadA1            |
| aadB             |
| aphA6            |
| gyrA             |
| parC             |
| qnrA             |
| carO             |
| adeR             |
| adeE             |
| armA             |
| rmtB             |
| rmtC             |
| IMP-1            |
| IMP-2            |
| VEB              |
| PER              |
| no gene detected |

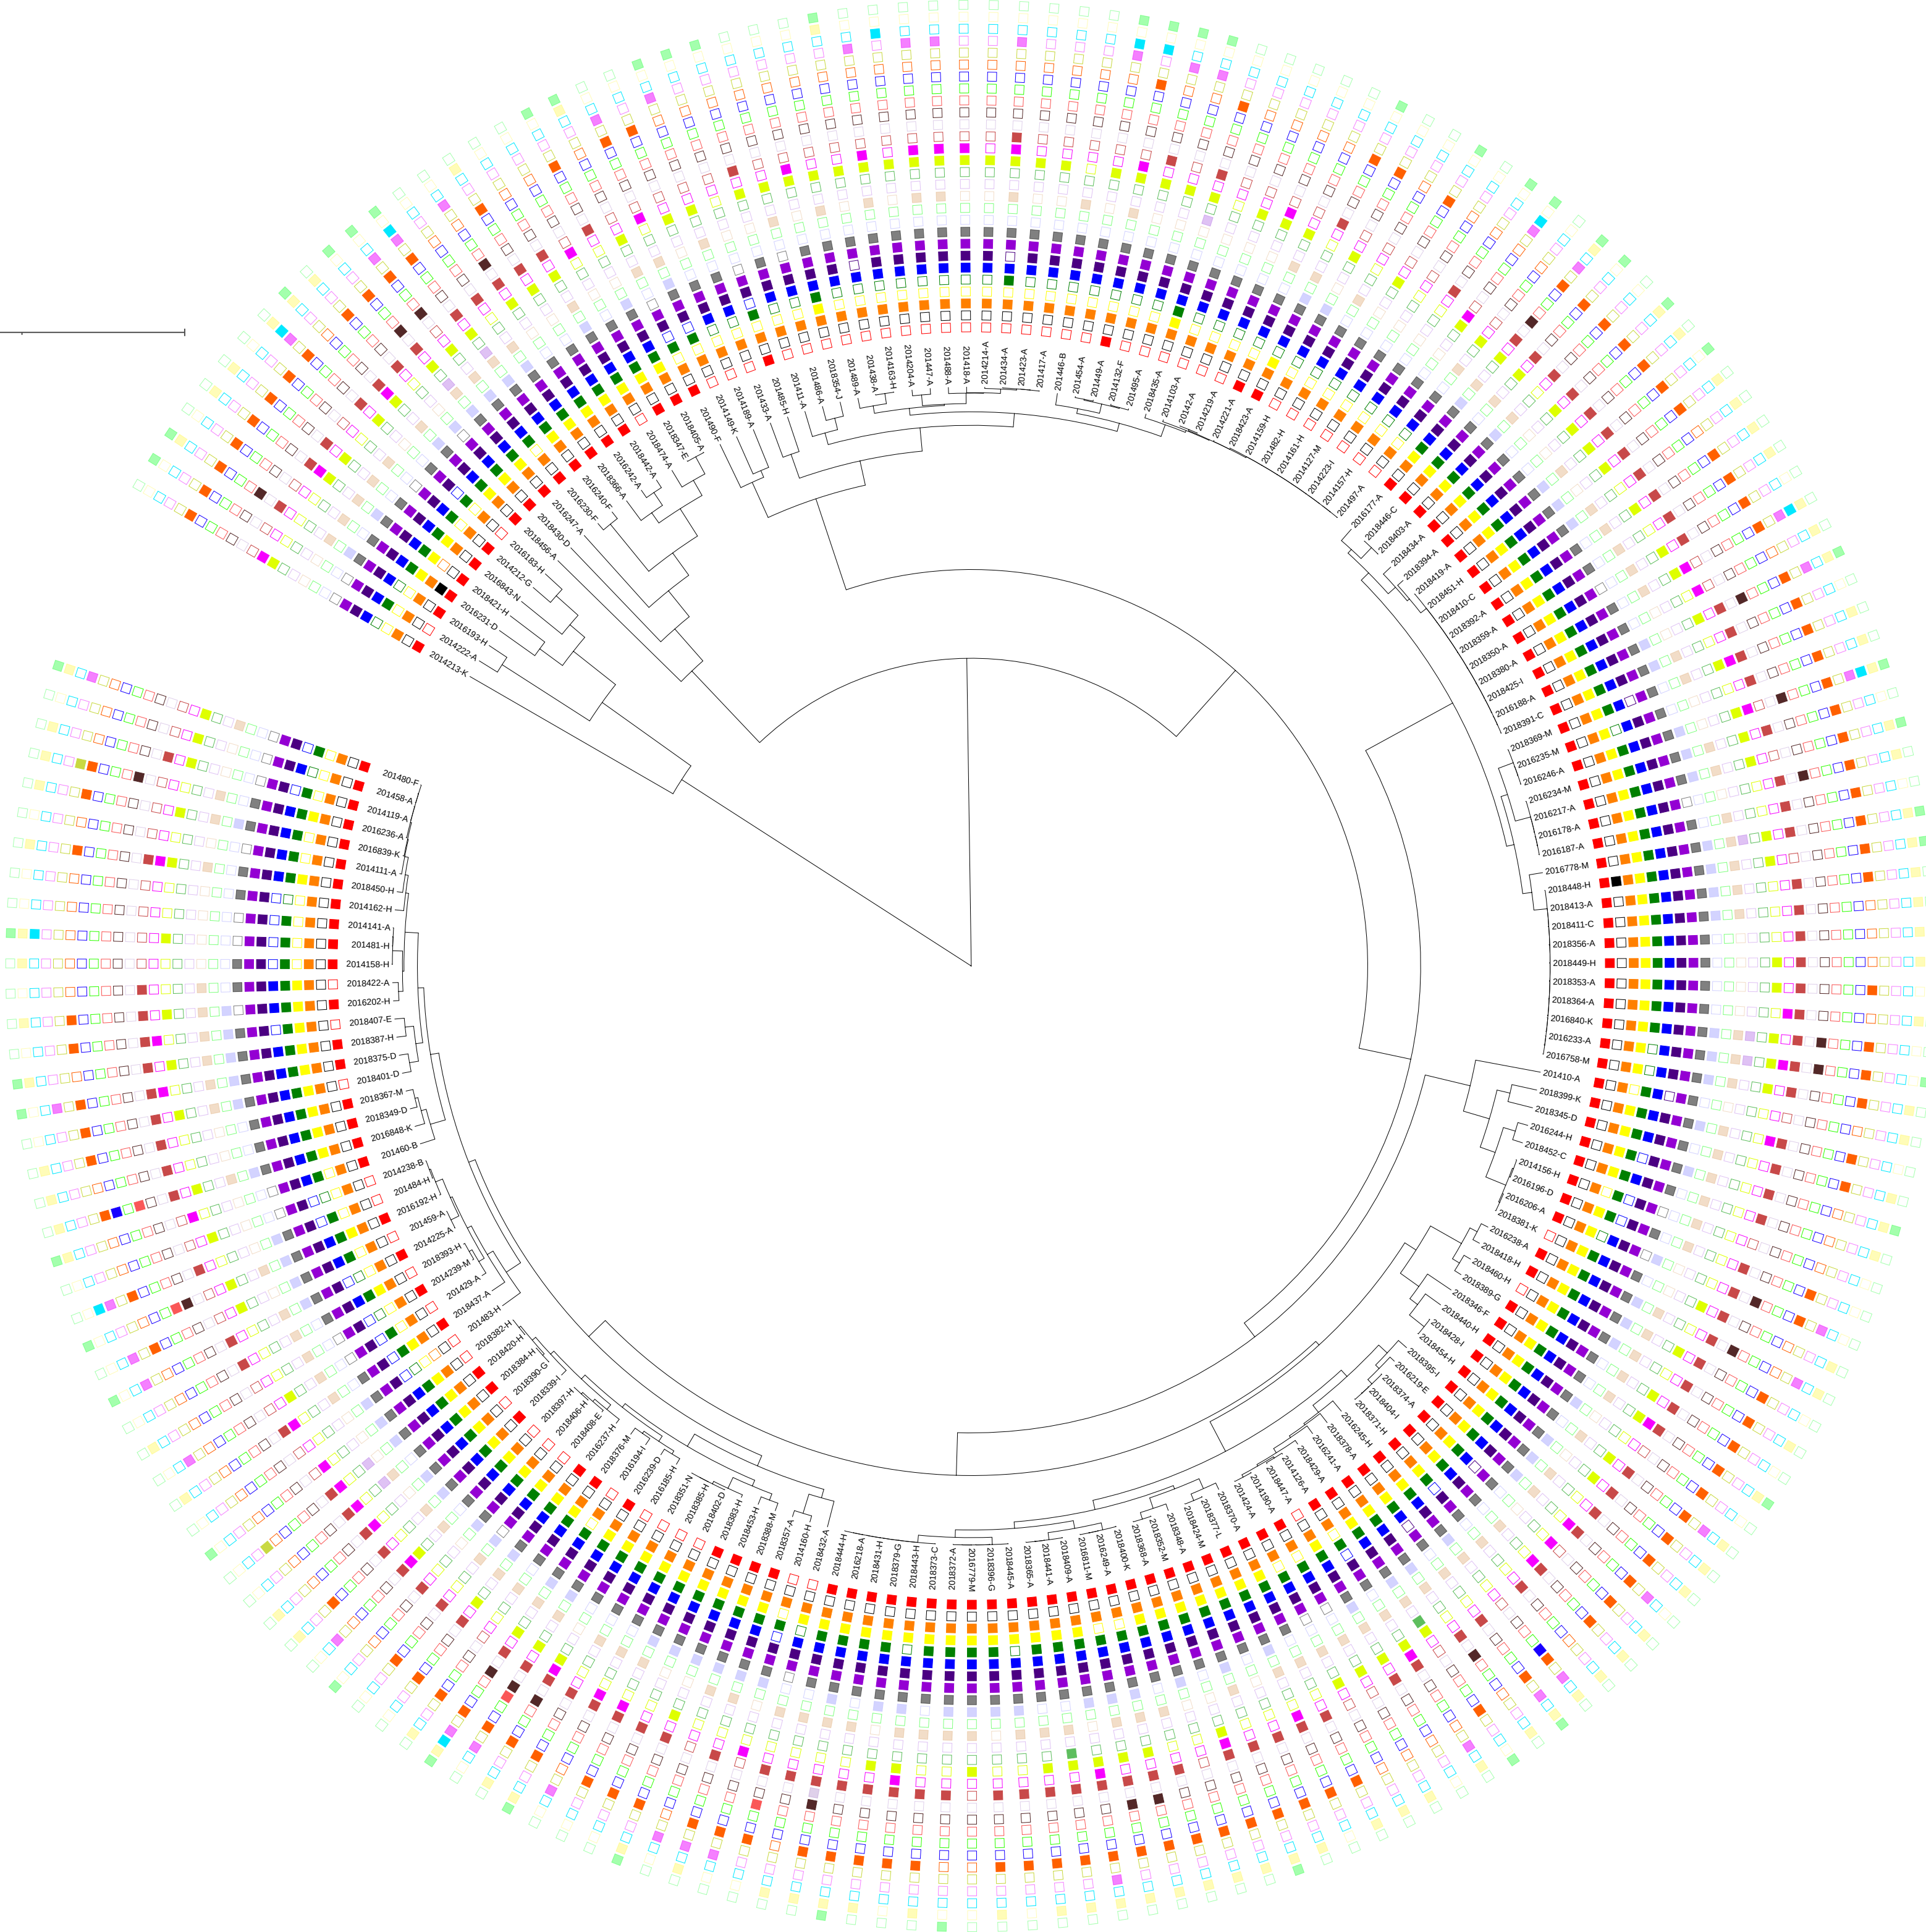

Supplement: s1 [file s1]
